# Supplementary material for: Smartphone-based kanamycin sensing with ratiometric FRET
Source: Royal Society of Chemistry journal article supplement (doi:10.1039/c8ra10035g), 2019-01-01
Supplement: c8ra10035g1.pdf [file c8ra10035g1.pdf]

## Electronic Supplementary Information

### Smartphone-based kanamycin sensing with ratiometric FRET

Saurabh Umrao<sup>a</sup>, Anusha S<sup>a</sup>, Vasundhara Jain<sup>a,†</sup>, Banani Chakraborty<sup>a</sup> and Rahul Roy<sup>a,b,c \*</sup>

---

*a.* Department of Chemical Engineering, Indian Institute of Science, Bangalore, 560012, India.

*b.* Molecular Biophysics Unit, Indian Institute of Science, Bangalore, 560012, India.

*c.* Center for Biosystems Science and Engineering, Indian Institute of Science, Bangalore, 560012, India.

*†.* Department of Biotechnology, Indian Institute of Technology, Roorkee, 247667, India.

*\*Corresponding author. E-mail: rahulroy@iisc.ac.in; Fax: +91-80-2360-8121; Tel: + 91-80-2293-3115/8*

Supplementary Figures S1-S6 (Page Numbers: 2-7)

Supplementary Table S1 (Page Number: 8)

# Supplementary figures

## Figure S1

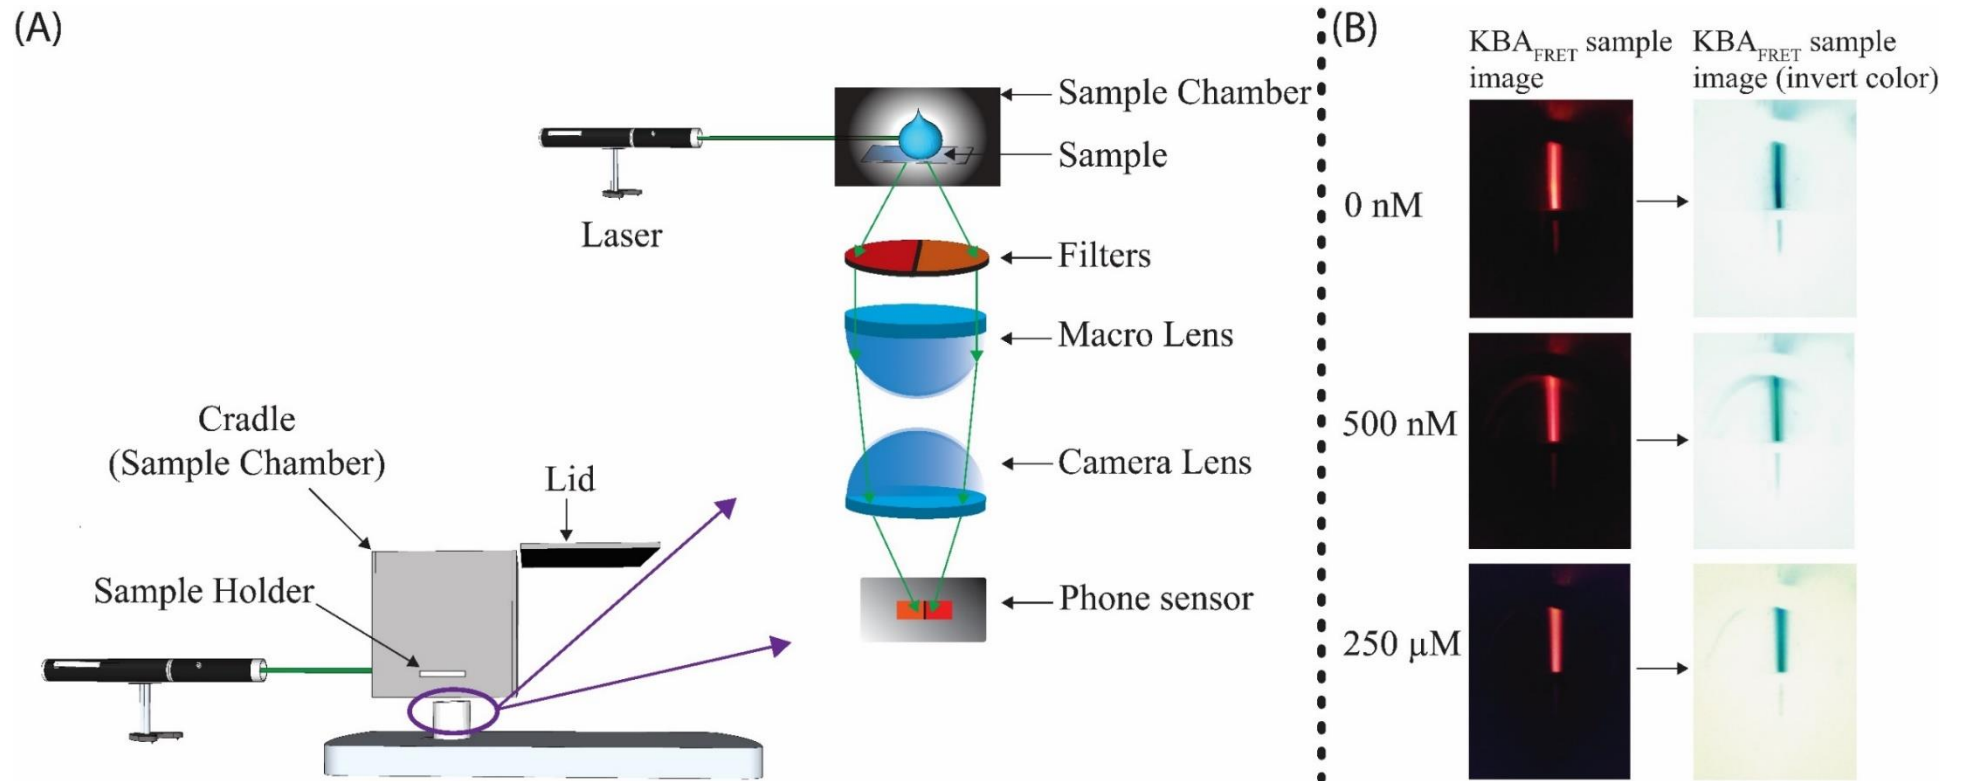

Figure S1: Smartphone-based fluorescence reader setup (A) Schematic of the smartphone setup along with the arrangement of optical components (B) Representative smartphone images acquired at three different concentrations from the custom smartphone setup is depicted. Fluorescence intensity ratio change for KBA<sub>FRET</sub> with increasing concentrations of kanamycin (0-250 μM) is calculated from the intensity levels in adjacent sections corresponding to different spectral windows as described in methods section.

# Figure S2

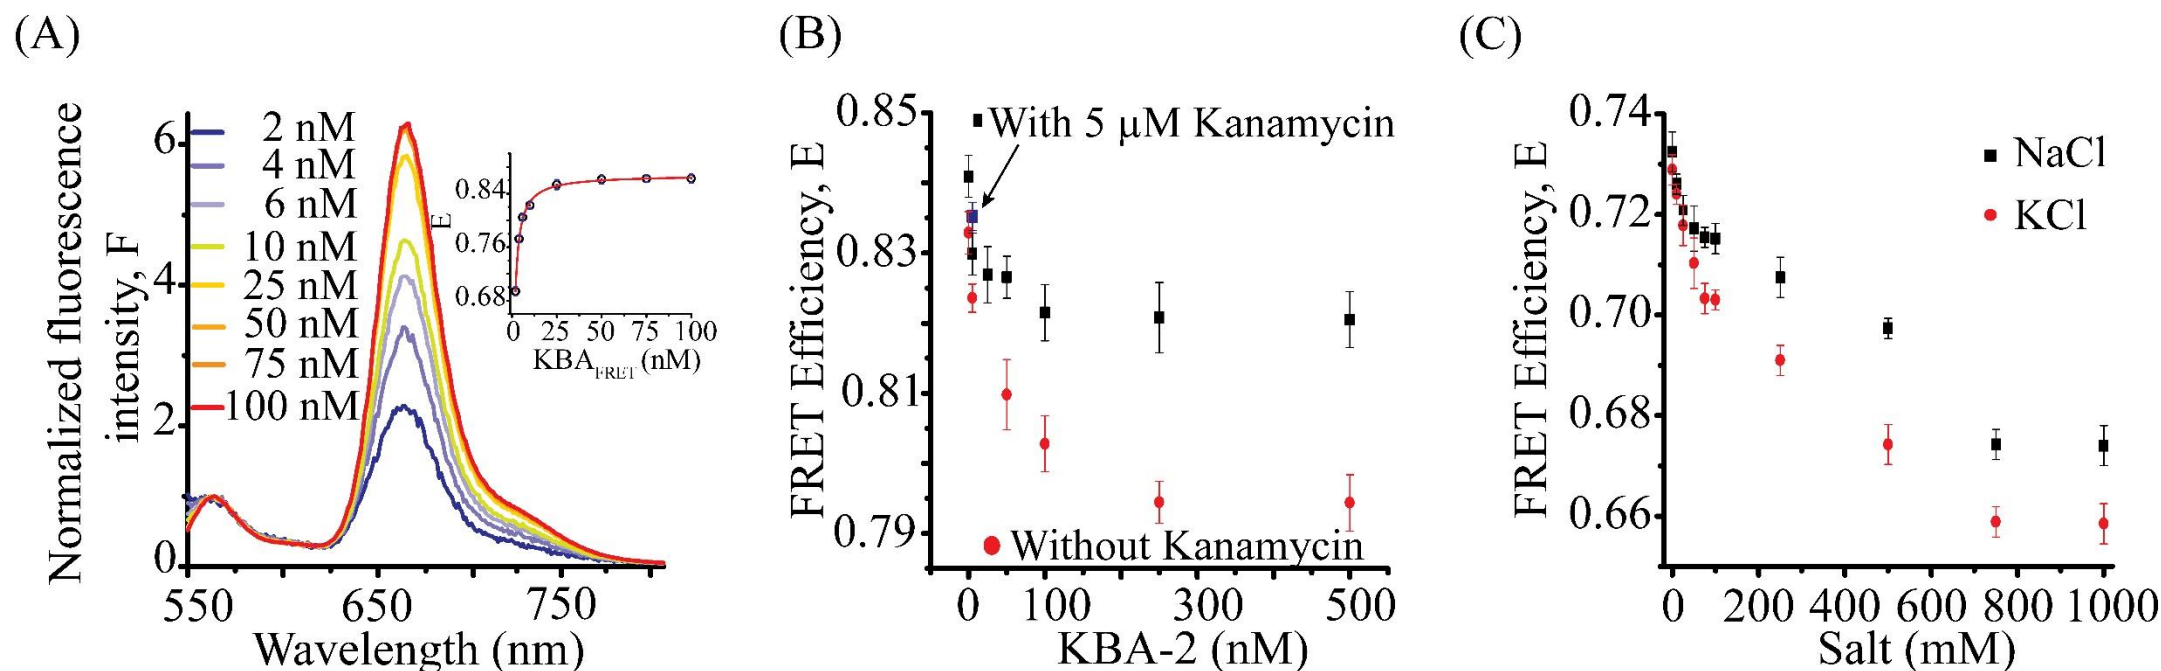

Figure S2: FRET measurement for KBA<sub>FRET</sub> (A) Fluorescence emission spectra normalized to donor fluorescence amplitude for KBA<sub>FRET</sub> at different aptamer concentrations. Inset: FRET efficiency change plotted against KBA<sub>FRET</sub> concentration and fit to the Hill function (line). (B) FRET efficiency change in KBA<sub>FRET</sub> with titration of unlabelled KBA-2 with and without Kanamycin. (C) FRET efficiency change for KBA<sub>FRET</sub> with salt titrations.

Figure S3

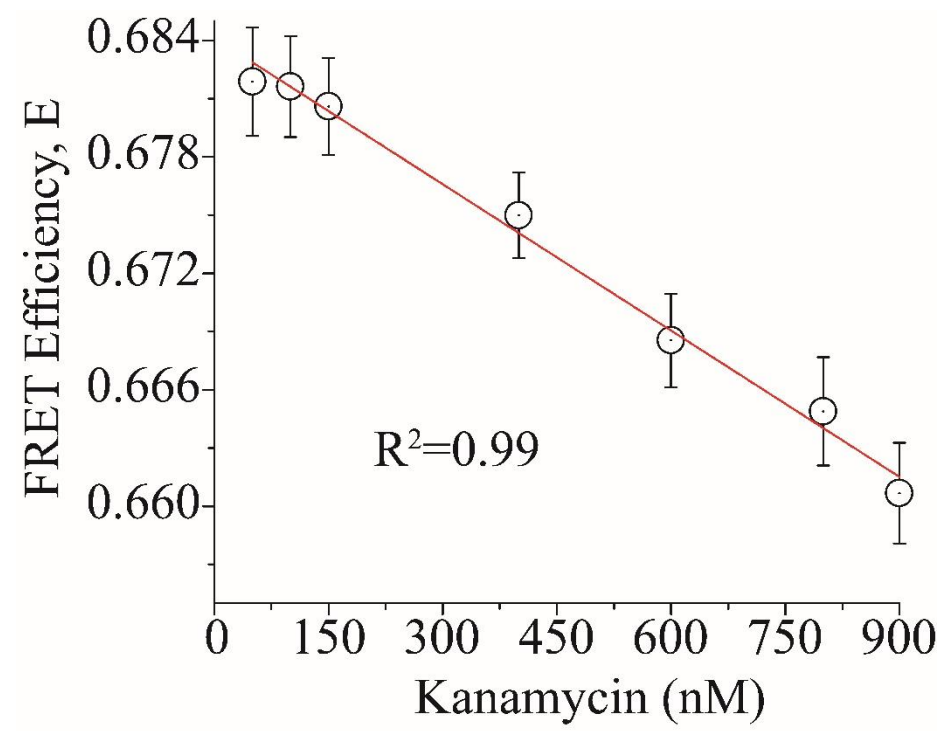

Figure S3: FRET efficiency as function of the kanamycin concentration from 50-900 nM is plotted and fit to the linear plot.

# Figure S4

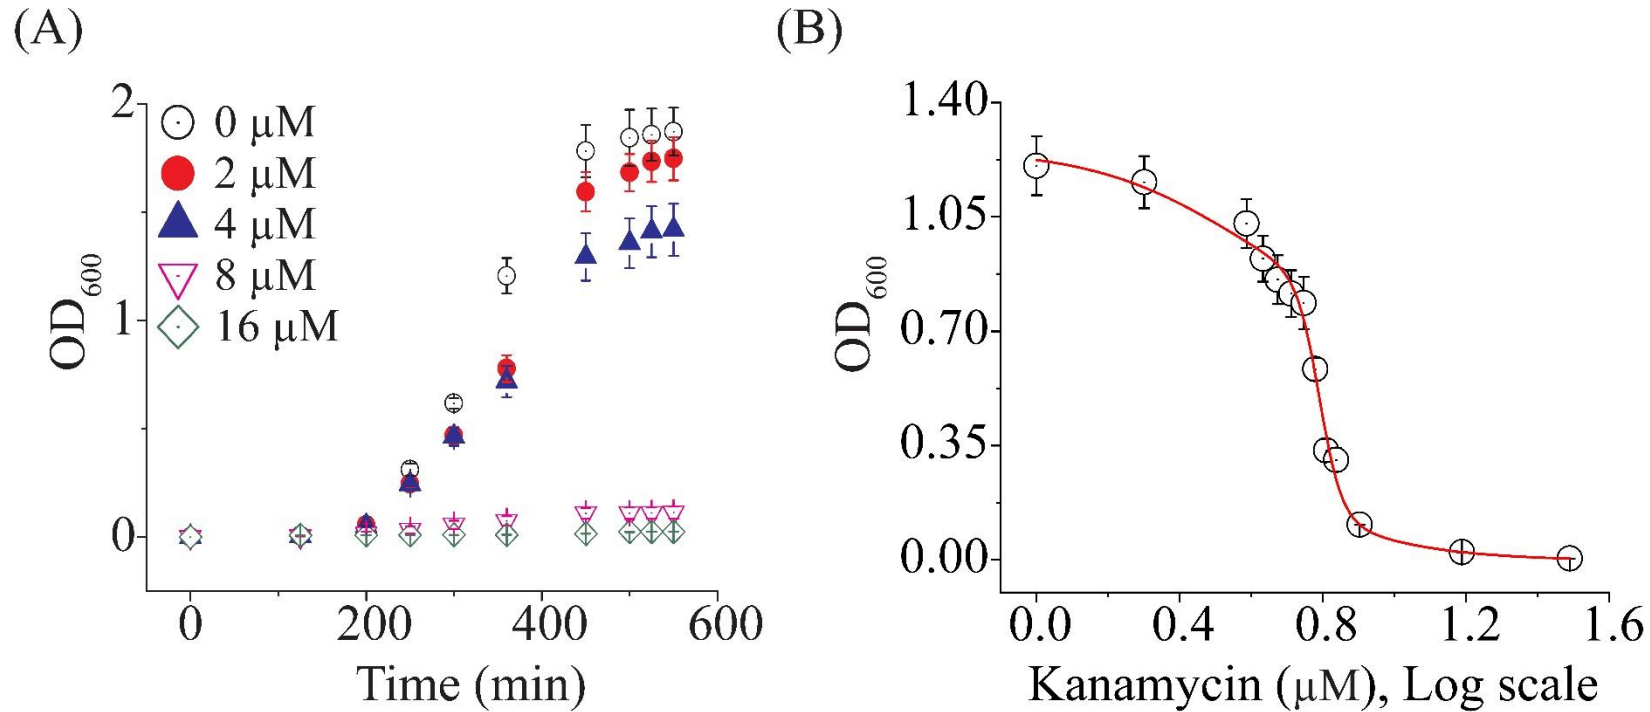

Figure S4: Growth curve of *E. coli* K-12 in Luria-Bertani (LB) media is plotted as the optical density ( $OD_{600}$ ) at different kanamycin concentrations. (A) Bacterial cell growth slows down with increasing concentration of kanamycin till beyond. (B)  $OD_{600}$  for a range of kanamycin (1-31  $\mu$ M) at  $t = 550$  mins is plotted. Minimum inhibitory concentration ( $MIC_{50}$ ) was calculated by fitting the curve using Gompertz model.<sup>57\*</sup> All experiments are done at 37°C rotary shaker at 180 rpm speed. We obtained  $MIC_{50}$  value of 8.1  $\mu$ M (4.7  $\mu$ g/mL), comparable to the reported value of 7.7  $\mu$ M (4.5  $\mu$ g/mL) for kanamycin against *E. coli*.<sup>58-59\*</sup>

\* References are listed in the main text.

Figure S5

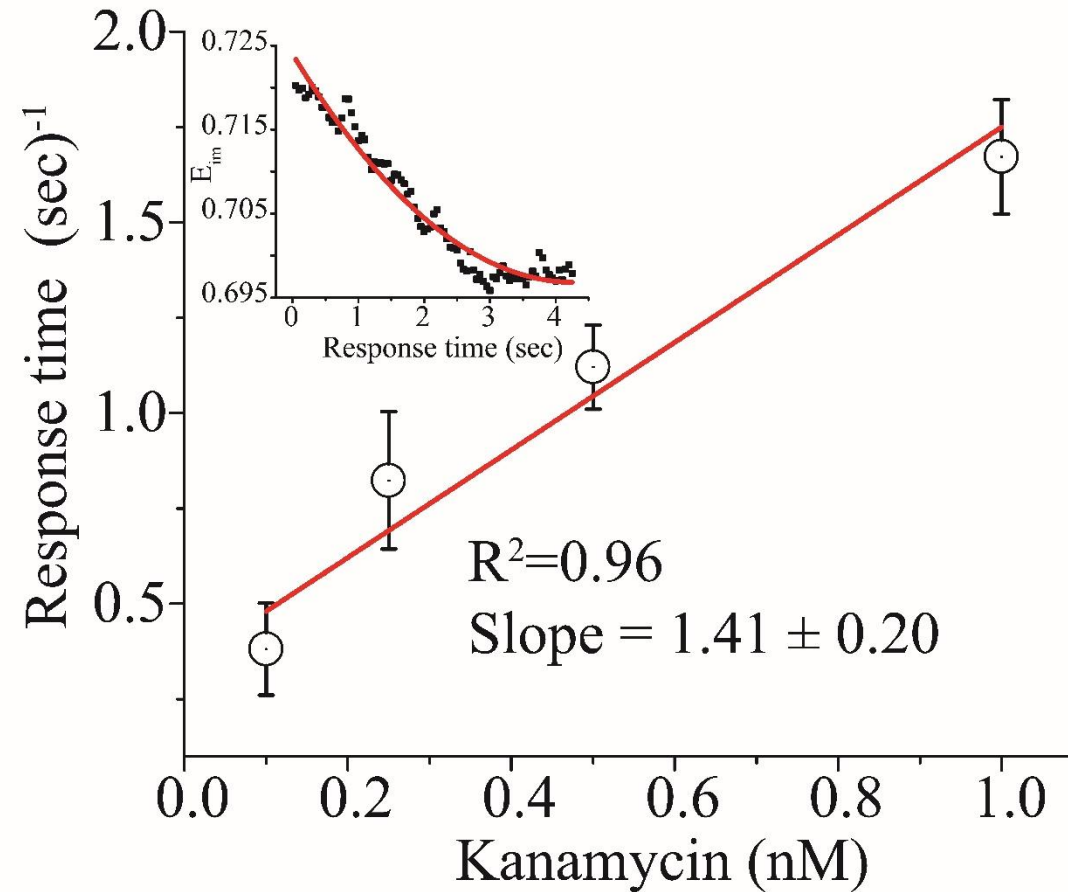

Figure S5: Kanamycin binding with KBA<sub>FRET</sub> yields a bimolecular association rate constant of  $(1.41 \pm 0.20) \times 10^9 \text{ M}^{-1}\text{s}^{-1}$ . Inset: KBA<sub>FRET</sub> binding with 100 pM kanamycin is rapid and reaches equilibrium within  $\sim 3$  seconds.

Figure S6

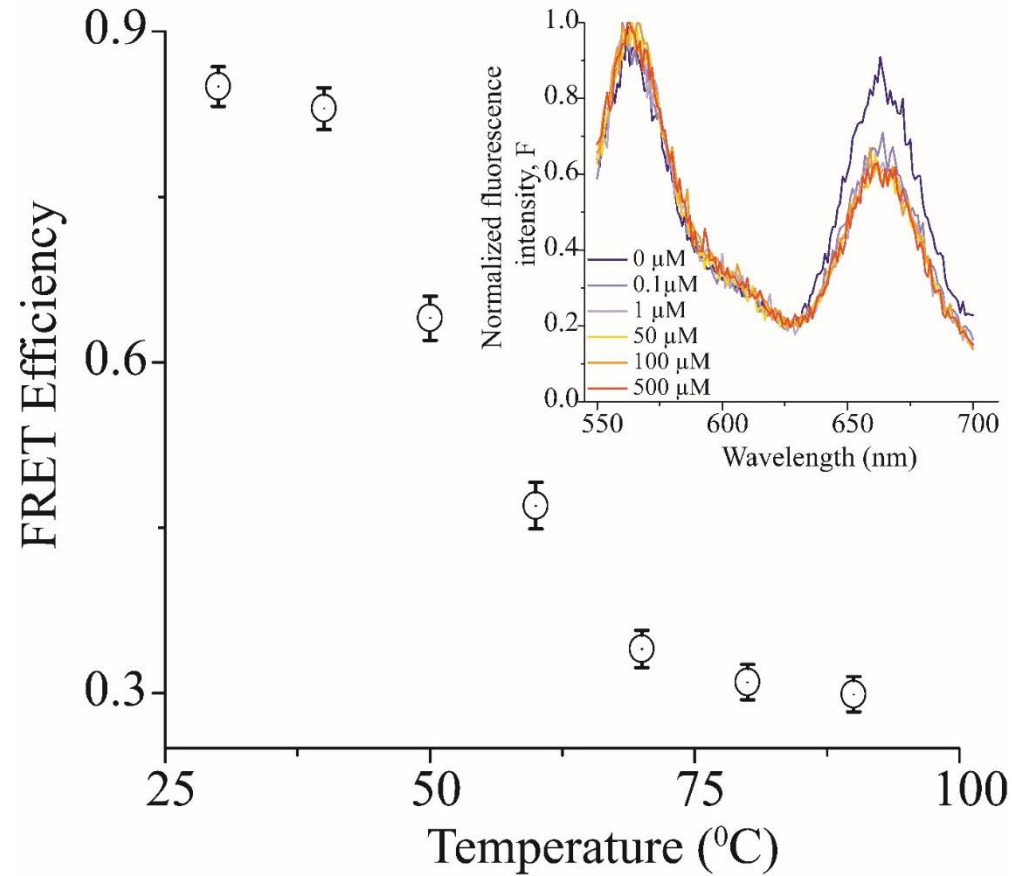

Figure S6: Effect of temperature on KBA<sub>FRET</sub> construct. Change in FRET efficiency with temperature in absence of kanamycin is plotted. Inset shows the fluorescence change for acceptor emission of KBA<sub>FRET</sub> as a function of kanamycin concentrations at 60°C.

Supplementary Table S1: Comparison of the proposed method with currently available methods for kanamycin detection.

| Methods                    | Analytical range  | LOD    | Application to samples | Ref.      |
|----------------------------|-------------------|--------|------------------------|-----------|
| Electrochemistry           | 0.05-9.0 $\mu$ M  | 9.4    | yes                    | 1         |
| Photoelectrochemical       | 1-230 nM          | 0.2    | no                     | 2         |
| Cantilever array           | 100 $\mu$ M-10 mM | 50,000 | no                     | 3         |
| Surface plasmon resonance  | 20-800 nM         | 2      | yes                    | 4         |
| Resonance light scattering | 10-600 nM         | 1      | yes                    | 5         |
| Capillary electrophoresis  | 0.68-8.5 $\mu$ M  | 170    | yes                    | 6         |
| Spectrophotometry          | 20-100 nM         | 9.21   | yes                    | 7         |
| Colorimetry                | -                 | 25     | no                     | 8         |
| Luminescence               | -                 | 143    | yes                    | 9         |
| Fluorescence               | 0.5-20 nM         | 0.32   | yes                    | 10        |
| Fluorescence               | 0.1-20 $\mu$ M    | 59     | yes                    | 11        |
| FRET                       | 4-25 $\mu$ M      | 1100   | yes                    | 12        |
| FRET                       | 1 - 20 pM         | 0.001  | yes                    | 13*       |
| FRET                       | 0.05 - 5 nM       | 0.18   | yes                    | this work |
| FRET <sub>smartphone</sub> | 50 - 500 nM       | 28     | yes                    | this work |

\* A different aptamer sequence with higher affinity for kanamycin was used.

#### References:

1. Y. Zhu, P. Chandra, K. M. Song, C. Ban and Y. B. Shim, *Biosensors & Bioelectronics*, 2012, **36**, 29-34.
2. R. Z. Li, Y. Liu, L. Cheng, C. Z. Yang and J. D. Zhang, *Analytical Chemistry*, 2014, **86**, 9372-9375.
3. X. J. Bai, H. Hou, B. L. Zhang and J. L. Tang, *Biosensors & Bioelectronics*, 2014, **56**, 112-116.
4. X. Y. Wang, M. J. Zou, X. Xu, R. Lei, K. A. Li and N. Li, *Analytical and Bioanalytical Chemistry*, 2009, **395**, 2397-2403.
5. C. K. Wang, C. G. Wang, Q. Q. Wang and D. Chen, *Analytical and Bioanalytical Chemistry*, 2017, **409**, 2839-2846.
6. Y. H. Long, A. Hernandez, E. Kaale, A. Van Schepdael, E. Roets, F. Borrull, M. Calull and J. Hoogmartens, *Journal of Chromatography B-Analytical Technologies in the Biomedical and Life Sciences*, 2003, **784**, 255-264.
7. C. S. Wang, J. Liu, X. Y. Han, C. Liu, Y. P. Tian and N. D. Zhou, *Analytical Methods*, 2017, **9**, 4843-4850.
8. K. M. Song, M. Cho, H. Jo, K. Min, S. H. Jeon, T. Kim, M. S. Han, J. K. Ku and C. Ban, *Anal Biochem*, 2011, **415**, 175-181.
9. K. H. Leung, H. Z. He, D. S. H. Chan, W. C. Fu, C. H. Leung and D. L. Ma, *Sensor Actuat B-Chem*, 2013, **177**, 487-492.
10. M. Ramezani, N. M. Danesh, P. Lavaee, K. Abnous and S. M. Taghdisi, *Sensor Actuat B-Chem*, 2016, **222**, 1-7.
11. Y. P. Xing, C. Liu, X. H. Zhou and H. C. Shi, *Scientific Reports*, 2015, **5**.
12. Y. S. Wang, T. C. Ma, S. Y. Ma, Y. J. Liu, Y. P. Tian, R. N. Wang, Y. B. Jiang, D. J. Hou and J. L. Wang, *Microchimica Acta*, 2017, **184**, 203-210.
13. N. R. Ha, I. P. Jung, I. J. La, H. S. Jung and M. Y. Yoon, *Scientific Reports*, 2017, **7**.
